# Supplementary material for: Impacts of COVID-19 Restrictions on Young Children’s Outdoor Activity: A Systematic Review
Source: MDPI journal article supplement (doi:10.3390/children9101564), 2022-10-16
Supplement: s1 [file s1]

### Supplementary File S2 Quality assessment

**Table S2:** Outcome of the critical appraisal of the included studies (Cross sectional studies)

| S/No | Study reference             | Criteria assessed based on JBI checklist |   |   |   |   |   |   |   | Total criteria met |
|------|-----------------------------|------------------------------------------|---|---|---|---|---|---|---|--------------------|
|      |                             | 1                                        | 2 | 3 | 4 | 5 | 6 | 7 | 8 |                    |
| 1    | Ma et al. 2021              | Y                                        | Y | Y | Y | Y | Y | Y | Y | 8                  |
| 2    | Moore et al. 2020           | Y                                        | N | N | Y | Y | N | Y | Y | 5                  |
| 3    | Dunton et al. 2020          | Y                                        | Y | Y | U | Y | Y | Y | Y | 7                  |
| 4    | Moore et al. 2021           | Y                                        | N | Y | Y | Y | N | Y | Y | 6                  |
| 5    | Schnaiderman et al. 2021    | Y                                        | Y | Y | N | N | N | Y | Y | 5                  |
| 6    | Delisle Nystrom et al. 2020 | Y                                        | Y | Y | Y | Y | Y | Y | Y | 8                  |
| 7    | Okely. et al. 2021          | Y                                        | Y | Y | Y | Y | Y | Y | Y | 8                  |
| 8    | Nathan et al. 2021          | Y                                        | Y | Y | Y | Y | N | Y | Y | 7                  |
| 9    | Yum et al. 2021             | Y                                        | Y | U | U | N | N | N | Y | 3                  |
| 10   | Poulain et al. 2021         | Y                                        | Y | Y | N | Y | Y | U | Y | 6                  |
| 11   | Shneor et al. 2021          | Y                                        | Y | Y | Y | N | N | Y | Y | 6                  |

Criteria 1-8: 1: clarity of inclusion criteria in the sample; 2: detailed description of the study subjects and settings; 3: measured exposure in a valid and reliable way; 4:objective, standard criteria for measurement of the condition; 5: identified confounding factors; 6:stated strategies to deal with confounding factors; 7: measured outcomes in a valid and reliable way; 8: appropriateness of statistical analysis. Key: Y=Yes, N=No, U=Unclear.

**Table S2:** Outcome of the critical appraisal of the included studies (Qualitative study)

| S/No | Study reference       | Criteria assessed based on JBI checklist |   |   |   |   |   |   |   |   |    | Total criteria met |
|------|-----------------------|------------------------------------------|---|---|---|---|---|---|---|---|----|--------------------|
|      |                       | 1                                        | 2 | 3 | 4 | 5 | 6 | 7 | 8 | 9 | 10 |                    |
| 1    | Lafave, L.et al. 2021 | Y                                        | Y | Y | Y | Y | Y | Y | Y | Y | U  | 9                  |
| 2    | Pelletier et al. 2021 | Y                                        | Y | Y | Y | Y | N | Y | Y | Y | Y  | 9                  |
| 3    | Pascal et al. 2021    | Y                                        | Y | Y | Y | Y | Y | Y | Y | N | Y  | 9                  |
| 4    | Neshteruk et al. 2021 | N                                        | Y | Y | Y | Y | N | Y | Y | Y | Y  | 8                  |

Criteria 1-10: 1: congruity between the stated philosophical perspective and the research methodology; 2: congruity between the research methodology and the research question or objectives; 3: congruity between the research methodology and the methods used to collect data; 4: congruity between the research methodology and the representation and analysis of data; 5: congruence between the research methodology and the interpretation of results; 6: locating the researcher culturally or theoretically; 7:

influence of the researcher on the research, and vice-versa, is addressed; 8: representation of participants and their voices; 9: ethical approval by an appropriate body; 10: relationship of conclusions to analysis, or interpretation of the data. Key: Y=Yes, N=No, U=Unclear.
