# Supplementary material for: Impacts of COVID-19 Restrictions on Young Children’s Outdoor Activity: A Systematic Review
Source: MDPI journal article supplement (doi:10.3390/children9101564), 2022-10-16
Supplement: s1 [file s1]

## **Supplementary File S1-Search strategies**

### **1. Education Research Complete, Psychology and Behavioral Sciences Collection, SPORTDiscus with Full Text (EBSCOhost)**

Search date: 22/11/2021

( COVID-19 or coronavirus or "COVID-19 pandemic" or 2019-ncov or sars-cov-2 or cov-19 or pandemic or lockdown or "social distanc\*" or "School clos\*" ) AND ( outdoor or "outdoor spaces" or outside or nature or park or playground or garden or "front yard" or "green space\*" or neighborhood or street\* ) AND ( play or "free play" or "unstructured play" or "independent mobilit\*" or activit\* or "unorganized physical activit\*" or "organized physical activit\*" ) AND ( child\* or kid or boy or girl or infant or toddler or "early years" or youth )

Results: 130 articles (No limits)

Limited to peer-reviewed : 109; limited after 2020: 95; limited to English: 94

### **2. ERIC (ProQuest)**

Search date: 22/11/2021

( COVID-19 or coronavirus or "COVID-19 pandemic" or 2019-ncov or sars-cov-2 or cov-19 or pandemic or lockdown or "social distanc\*" or "School clos\*" ) AND ( outdoor or "outdoor spaces" or outside or nature or park or playground or garden or "front yard" or "green space\*" or neighborhood or street\* ) AND ( play or "free play" or "unstructured play" or "independent mobilit\*" or activit\* or "unorganized physical activit\*" or "organized physical activit\*" ) AND ( child\* or kid or boy or girl or infant or toddler or "early years" or youth )

Results: 44 articles (No limits)

Limited to peer-reviewed: 21; limited after 2020: 15; limited to English: 13

### **3. WHO COVID-19 Database**

Search date: 22/11/2021

Title, abstract, subject: COVID-19 and outdoor activity and child

Results: 26 articles (No limits)

Limited to English: 25; limited after 2020: 25

#### 4. Ovid MEDLINE(R) , APA PsycInfo

**Table S1:** Search date: 22/11/2021

| #  | Query                                                                                                                                                                          | Results from 16 Nov 2021 |
|----|--------------------------------------------------------------------------------------------------------------------------------------------------------------------------------|--------------------------|
| 1  | (COVID-19 or coronavirus or 2019-ncov or sars-cov-2 or cov-19 or pandemic or lockdown).mp. [mp=ti, ab, ot, nm, hw, fx, kf, ox, px, rx, ui, an, sy, tc, id, tm, mh]             | 141,434                  |
| 2  | "COVID-19 pandemic".mp. [mp=ti, ab, ot, nm, hw, fx, kf, ox, px, rx, ui, an, sy, tc, id, tm, mh]                                                                                | 40,475                   |
| 3  | (social distanc* or school clos*).mp. [mp=ti, ab, ot, nm, hw, fx, kf, ox, px, rx, ui, an, sy, tc, id, tm, mh]                                                                  | 9,851                    |
| 4  | (outdoor or outside or nature or park or playground or garden or neighborhood).mp. [mp=ti, ab, ot, nm, hw, fx, kf, ox, px, rx, ui, an, sy, tc, id, tm, mh]                     | 421,796                  |
| 5  | ("outdoor spaces" or "front yard").mp. [mp=ti, ab, ot, nm, hw, fx, kf, ox, px, rx, ui, an, sy, tc, id, tm, mh]                                                                 | 230                      |
| 6  | (green space* or street*).mp. [mp=ti, ab, ot, nm, hw, fx, kf, ox, px, rx, ui, an, sy, tc, id, tm, mh]                                                                          | 20,317                   |
| 7  | <a href="#">play.mp</a> . [mp=ti, ab, ot, nm, hw, fx, kf, ox, px, rx, ui, an, sy, tc, id, tm, mh]                                                                              | 297,574                  |
| 8  | ("free play" or "unstructured play").mp. [mp=ti, ab, ot, nm, hw, fx, kf, ox, px, rx, ui, an, sy, tc, id, tm, mh]                                                               | 3,479                    |
| 9  | (independent mobilit* or activit* or unorganized physical activit* or organized physical activit*).mp. [mp=ti, ab, ot, nm, hw, fx, kf, ox, px, rx, ui, an, sy, tc, id, tm, mh] | 1,047,936                |
| 10 | child*.mp. [mp=ti, ab, ot, nm, hw, fx, kf, ox, px, rx, ui, an, sy, tc, id, tm, mh]                                                                                             | 1,214,649                |
| 11 | (kid or boy or girl or infant or toddler or youth).mp. [mp=ti, ab, ot, nm, hw, fx, kf, ox, px, rx, ui, an, sy, tc, id, tm, mh]                                                 | 409,511                  |
| 12 | "early years".mp. [mp=ti, ab, ot, nm, hw, fx, kf, ox, px, rx, ui, an, sy, tc, id, tm, mh]                                                                                      | 5,850                    |
| 13 | 1 or 2 or 3                                                                                                                                                                    | 146,562                  |
| 14 | 4 or 5 or 6                                                                                                                                                                    | 438,951                  |
| 15 | 7 or 8 or 9                                                                                                                                                                    | 1,293,392                |
| 16 | 10 or 11 or 12                                                                                                                                                                 | 1,382,755                |

|    |                                                                                               |                 |
|----|-----------------------------------------------------------------------------------------------|-----------------|
| 17 | 13 and 14 and 15 and 16                                                                       | 149 (No limits) |
| 18 | limit 17 to english language                                                                  | 136             |
| 19 | limit 18 to peer reviewed journal [Limit not valid in Ovid MEDLINE(R); records were retained] | 127             |
| 20 | limit 19 to yr="2020 -Current"                                                                | 107             |
